# Supplementary material for: Pigmented self-cleaning coatings with enhanced UV resilience via the limitation of photocatalytic activity and its effects
Source: Royal Society of Chemistry journal article supplement (doi:10.1039/d0me00013b), 2020-01-01
Supplement: d0me00013b2.pdf [file d0me00013b2.pdf]

Movie S1: Water bouncing video 1:10-PDMS via google drive link.

[https://drive.google.com/open?id=1iUF5XrQmJANvJZr\\_qOrS\\_X6rxwqr\\_pVY](https://drive.google.com/open?id=1iUF5XrQmJANvJZr_qOrS_X6rxwqr_pVY)
